# Supplementary material for: Biodegradable and Biocompatible Thermoplastic Poly(Ester-Urethane)s Based on Poly(ε-Caprolactone) and Novel 1,3-Propanediol Bis(4-Isocyanatobenzoate) Diisocyanate: Synthesis and Characterization
Source: MDPI journal article supplement (doi:10.3390/polym14071288), 2022-03-23
Supplement: s1 [file s1]

# **Biodegradable thermoplastic poly(Ester-Urethane) Based on Poly( $\epsilon$ -caprolactone) and Novel 1,3-propanediol bis(4-isocyanatobenzoate) diisocyanate: Synthesis and characterization**

**Authors:** Alejandra Rubio Hernández-Sampelayo<sup>1,2</sup>, Rodrigo Navarro<sup>1</sup>, Dulce María González-García<sup>3,4</sup>, Luis García-Fernández<sup>1,5</sup>, Rosana Ramírez<sup>1,5</sup>, María Rosa Aguilar<sup>1,5</sup>, Ángel Marcos-Fernández<sup>1</sup>.

- 1- Institute of Polymer Science and Technology, Juan de la Cierva, 3, 28006, Madrid (Spain)
- 2- Universidad Nacional de Educación a Distancia (UNED), C/Bravo Murillo, 38, 28015 Madrid, Spain
- 3- Instituto Politécnico Nacional, ESIQIE, UPALM-Zacatenco, Col Lindavista, 07738, Mexico City (Mexico)
- 4- Universidad de Guanajuato, Dpto. de Química, Noria Alta s/n, 36050, Guanajuato, México
- 5- Biomedical Research Networking Center in the subject area of Bioengineering, Biomaterials and Nanomedicine (CIBER-BBN), Madrid, Spain

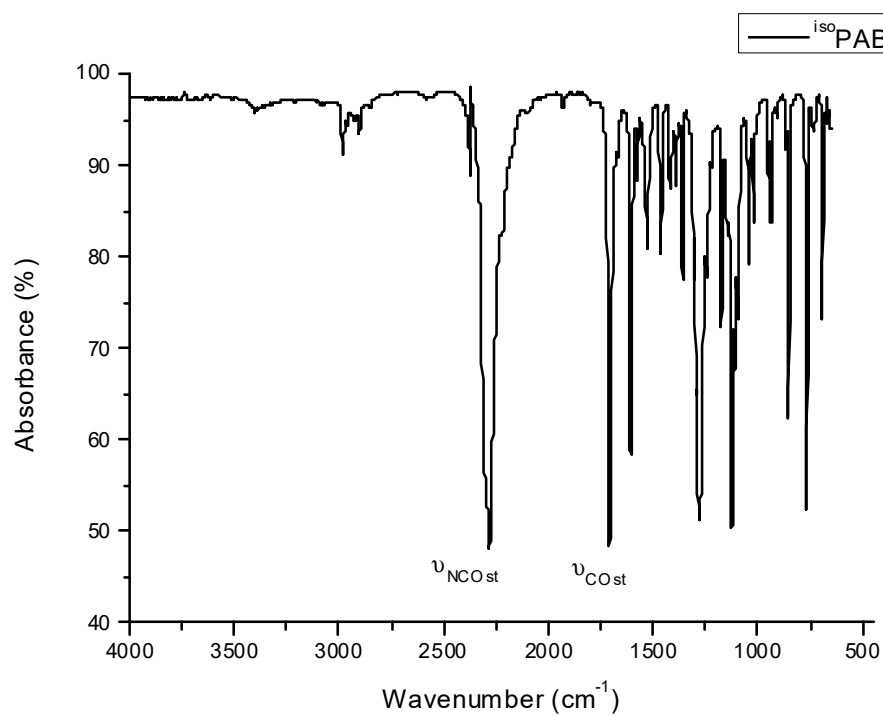

Figure S1: ATR-FTIR of aromatic diisocyanate isoPABA.

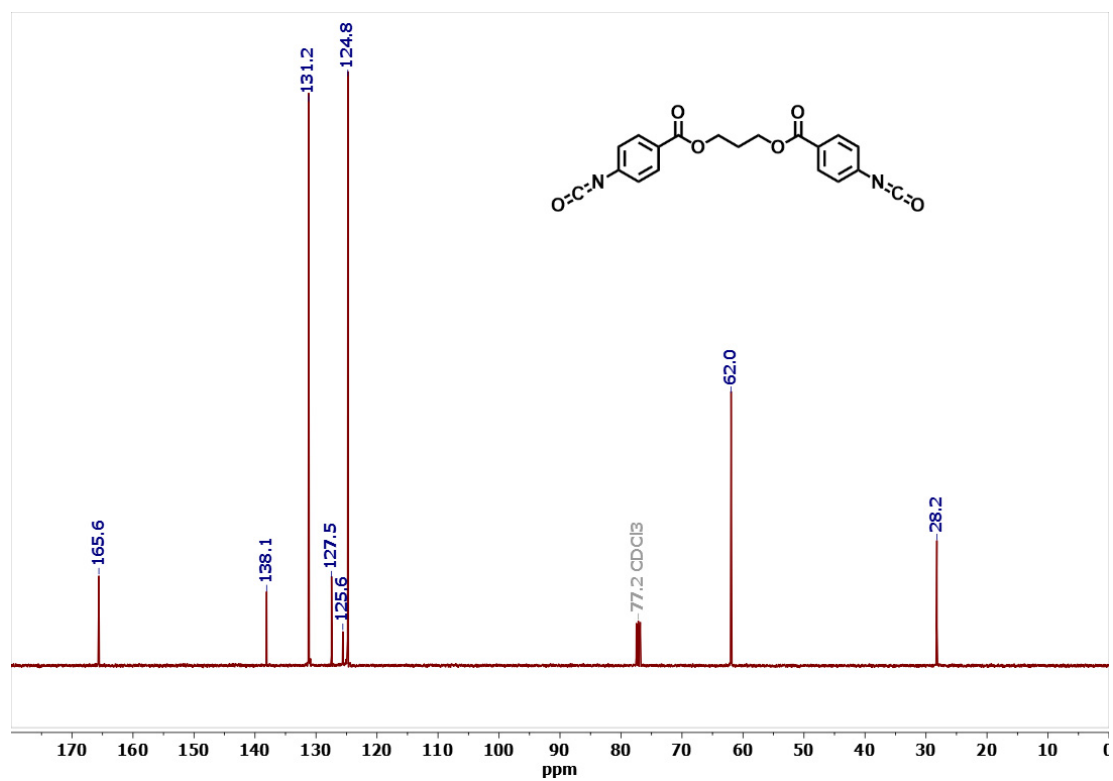

Figure S2: <sup>13</sup>C-NMR spectrum of isoPABA in deuterated chloroform.

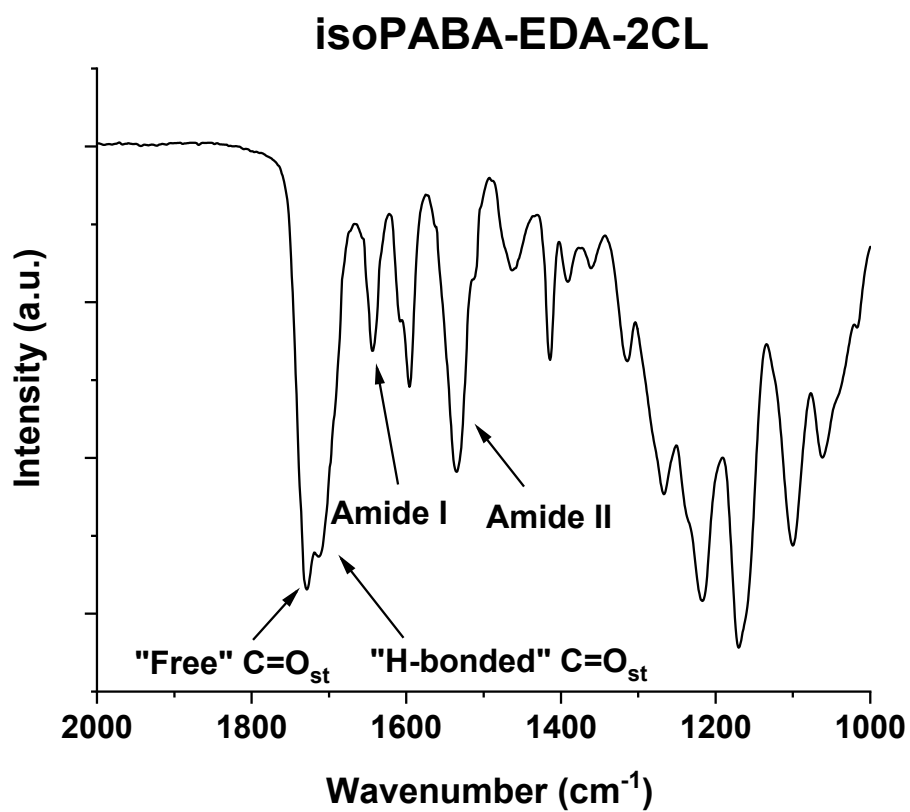

Figure S3. Extended FTIR-Spectrum between 2000 and 1000 cm<sup>-1</sup> of model polyurethane isoPABA-EDA-2CL.

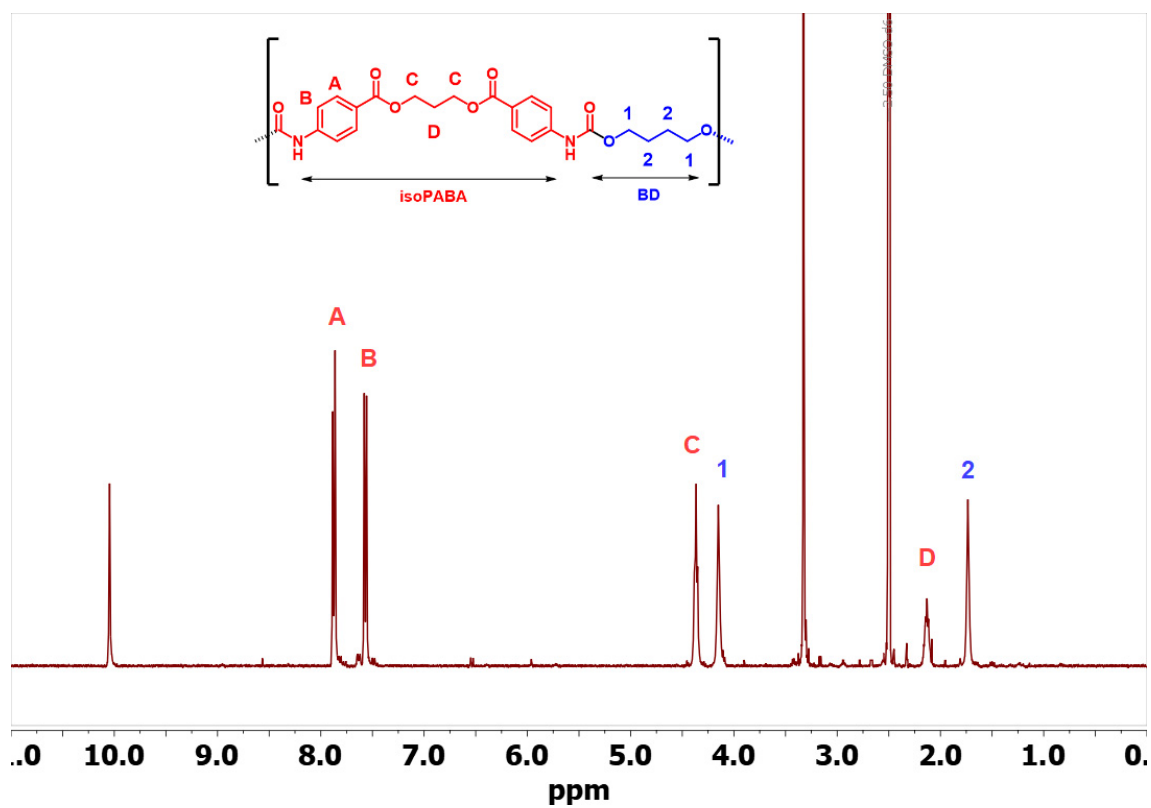

Figure S4: <sup>1</sup>H-NMR spectrum of model polyurethane isoPABA-BD in DMSO-d<sub>6</sub>.

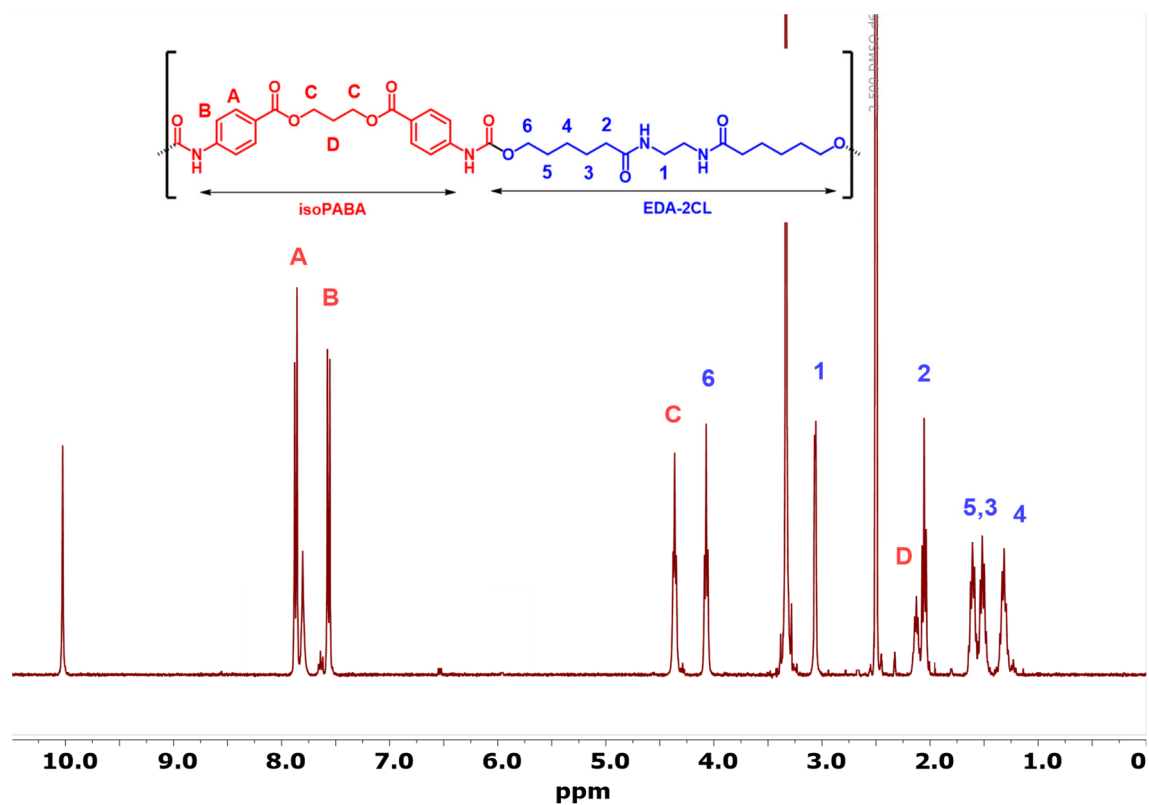

Figure S5: <sup>1</sup>H-NMR spectrum of polyurethane isoPABA-EDA-2CL in deuterated DMSO.

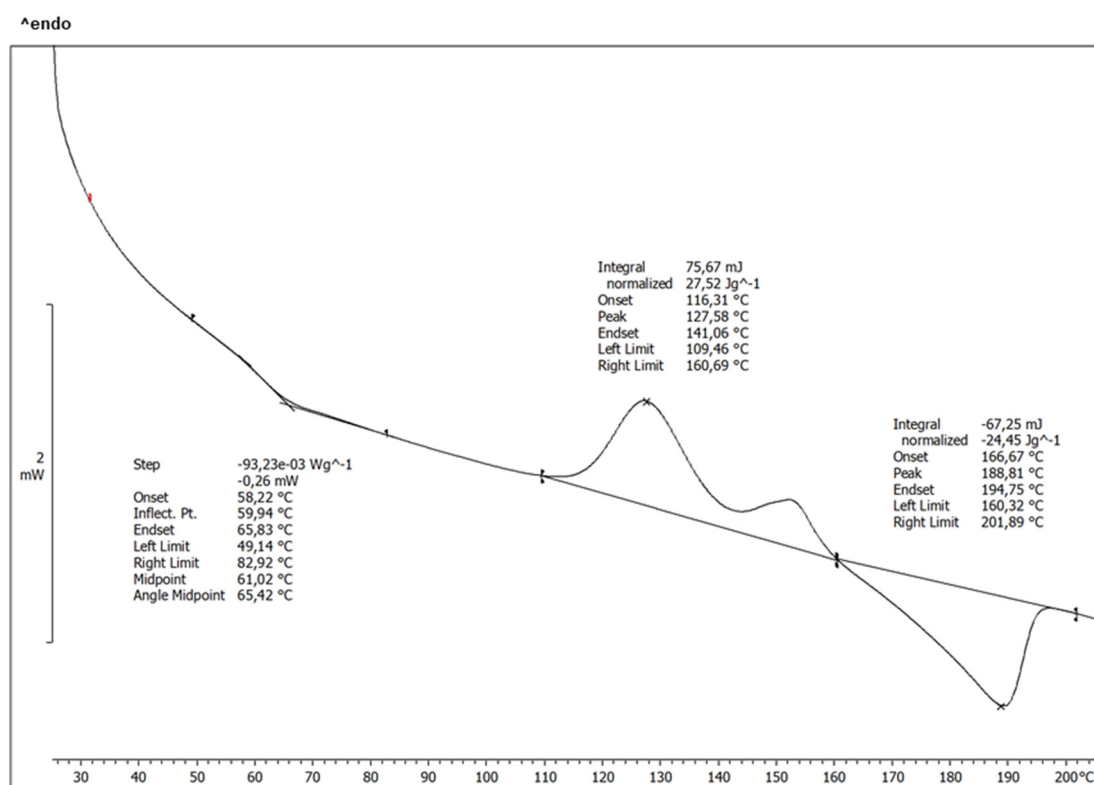

Figure S6: DSC curve of model polyurethane isoPABA-BD.

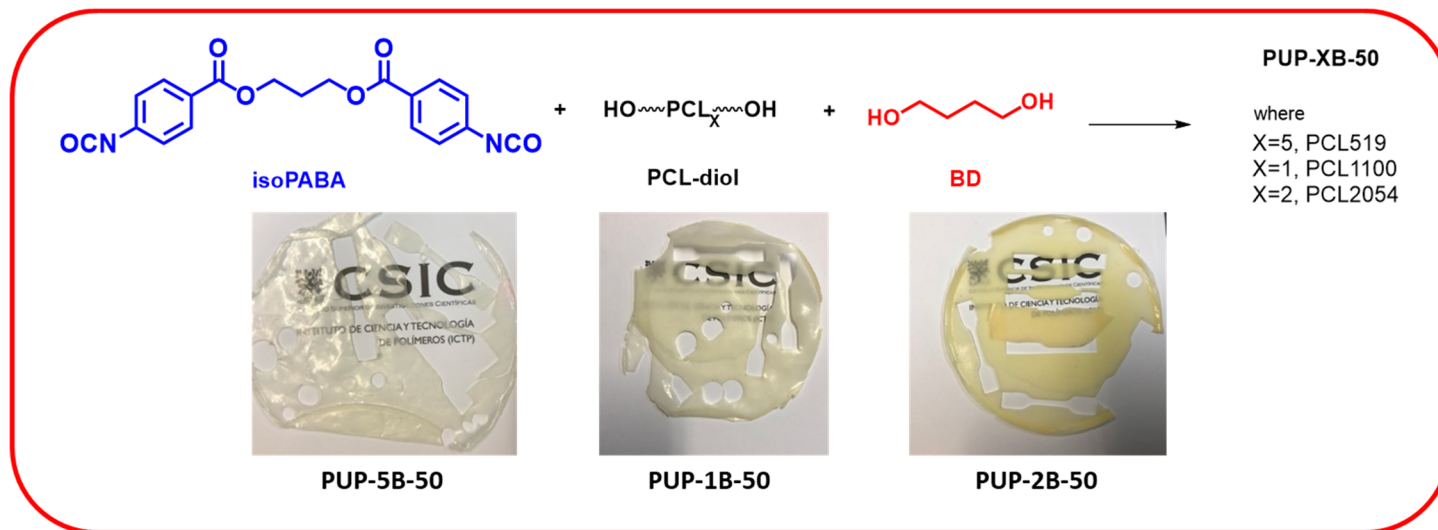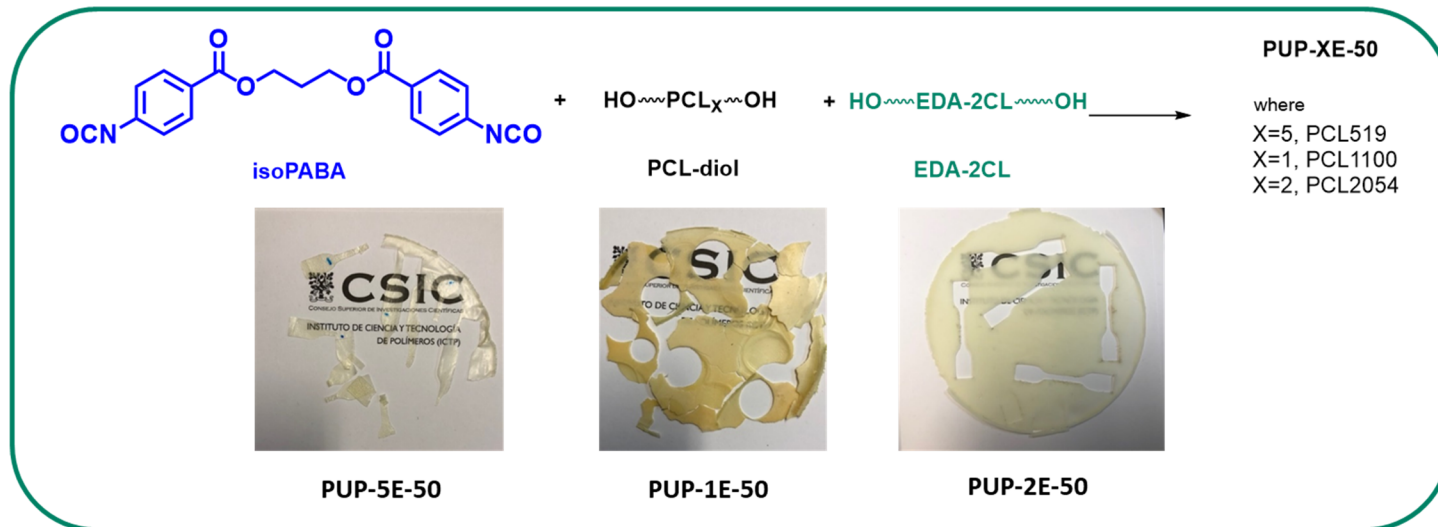

Figure S7: Synthesis scheme and images of poly(ester-urethane)s.

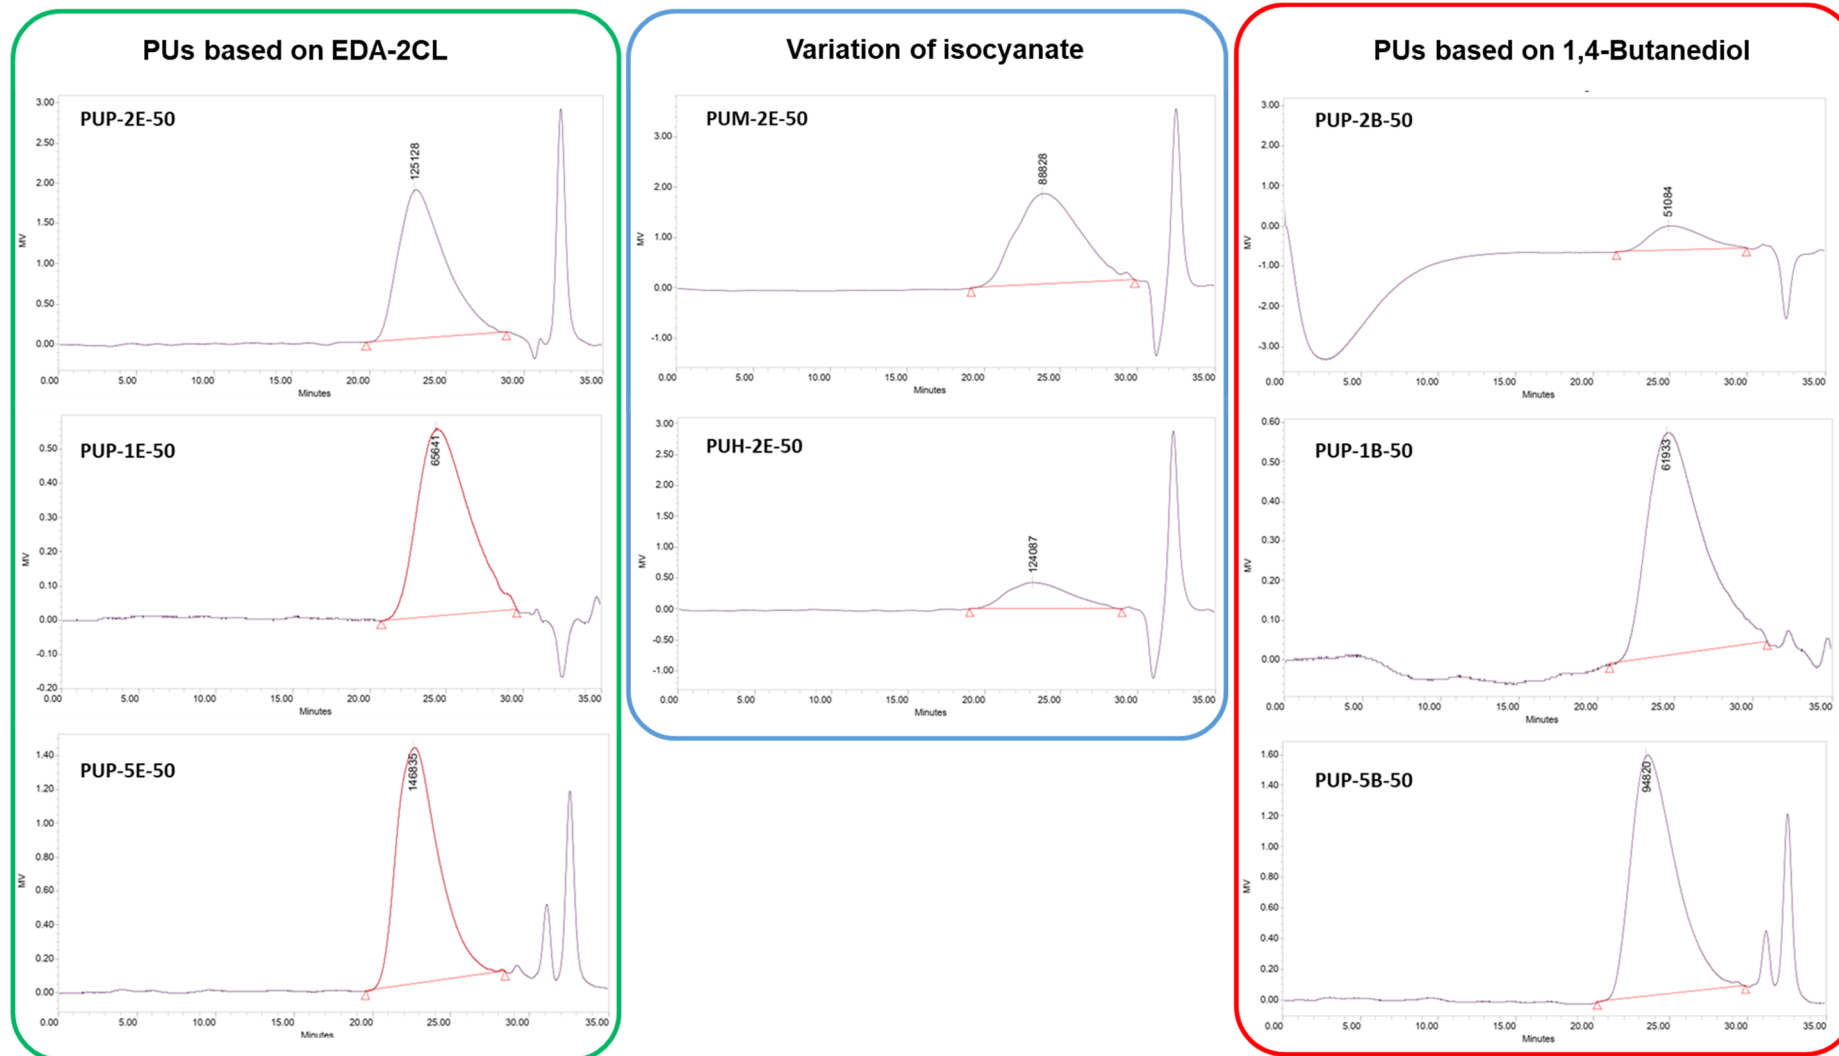

Figure S8. GPC traces of synthesised poly(ester-urethane)s.

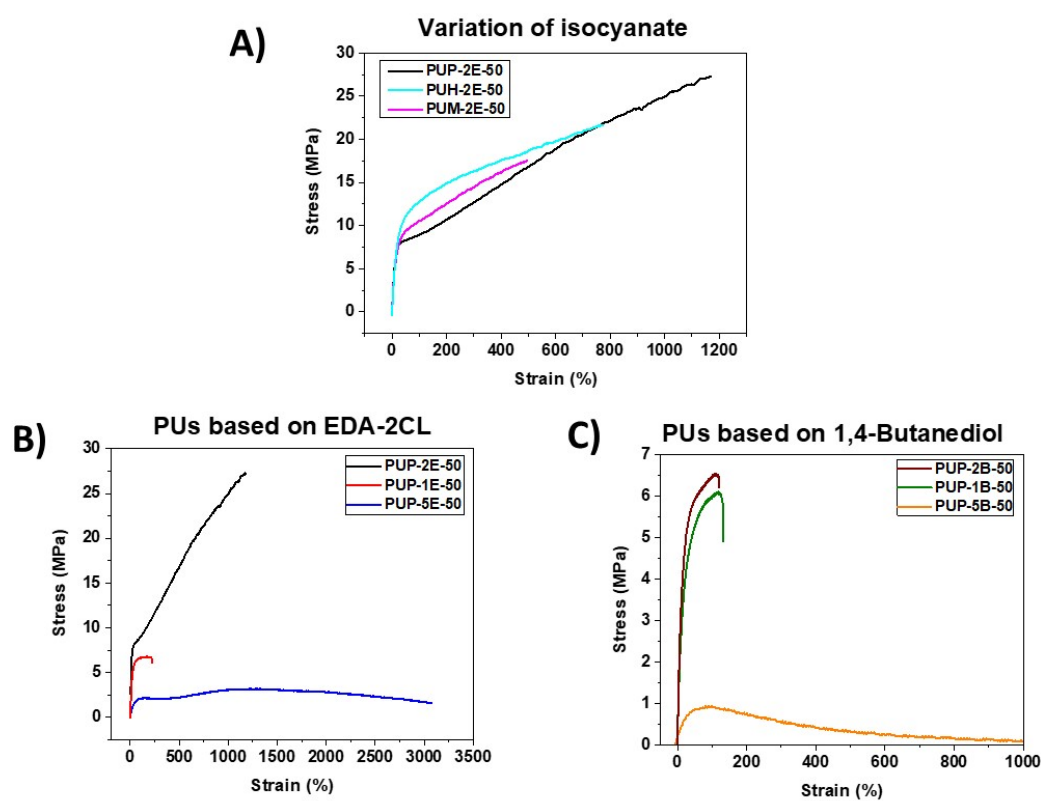

Figure S9: Stress-strain curves of synthesised poly(ester-urethane)s.



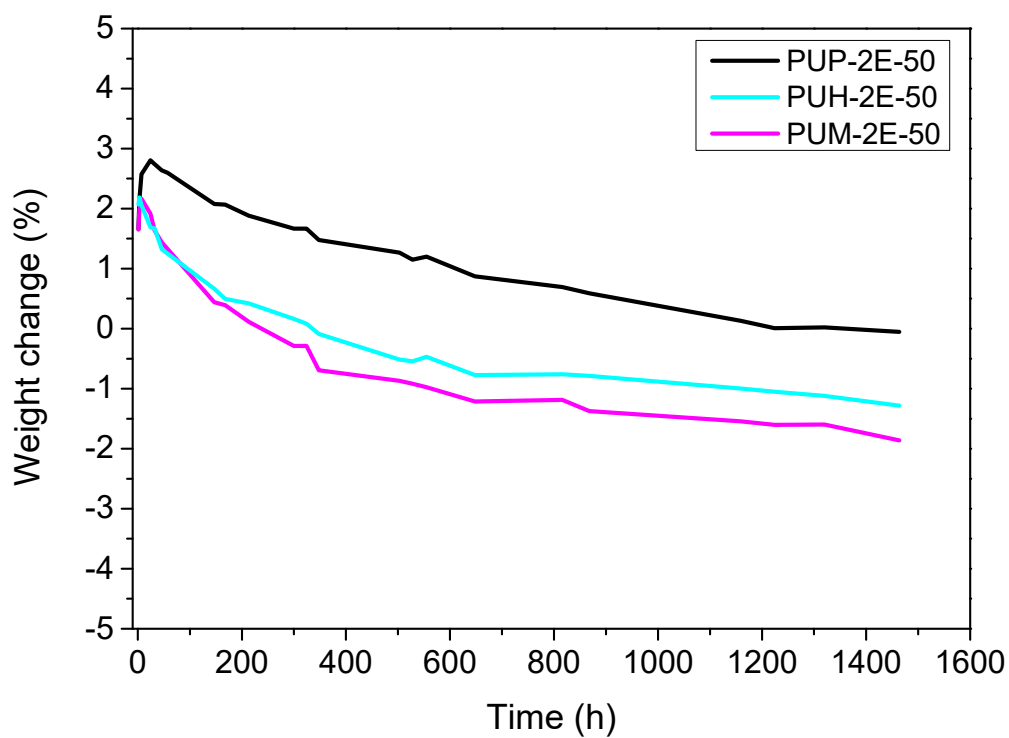

Figure S10: Weight change with immersion time in phosphate buffer solution at 37°C for hydrated poly(ester-urethane)s based on PCL2054.

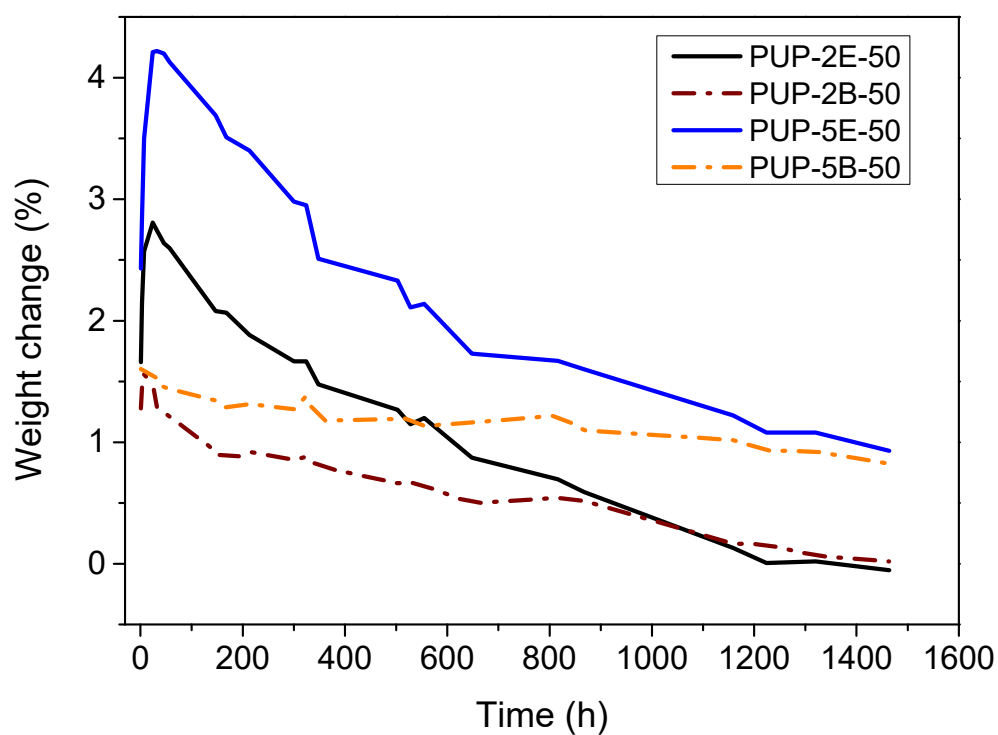

Figure S11: Weight change with immersion time in phosphate buffer solution at 37°C for hydrated poly(ester-urethane)s with different chain extender.
